# Supplementary material for: Genomic and phenotypic characterization of Mycobacterium tuberculosis’ closest-related non-tuberculous mycobacteria
Source: PubMed Central journal article supplement (PMC11237670; doi:10.1128/spectrum.04126-23), 2024-05-03

**Supplemental Fig. S1:** Comparison of the ESX systems of *M. lacus*, *M. riyadhense*, *M. shinjukuense* with *M. kansasii* and *Mtb* H37Rv.

Comparisons were performed for ESX-1 (A), ESX-2 (B), ESX-3 (C), ESX-4 (D), and ESX-5 (E) using the Artemis Comparison Tool and the “MicroScope” database from the Genoscope. (<https://mage.genoscope.cns.fr/microscope/home/index.php>)

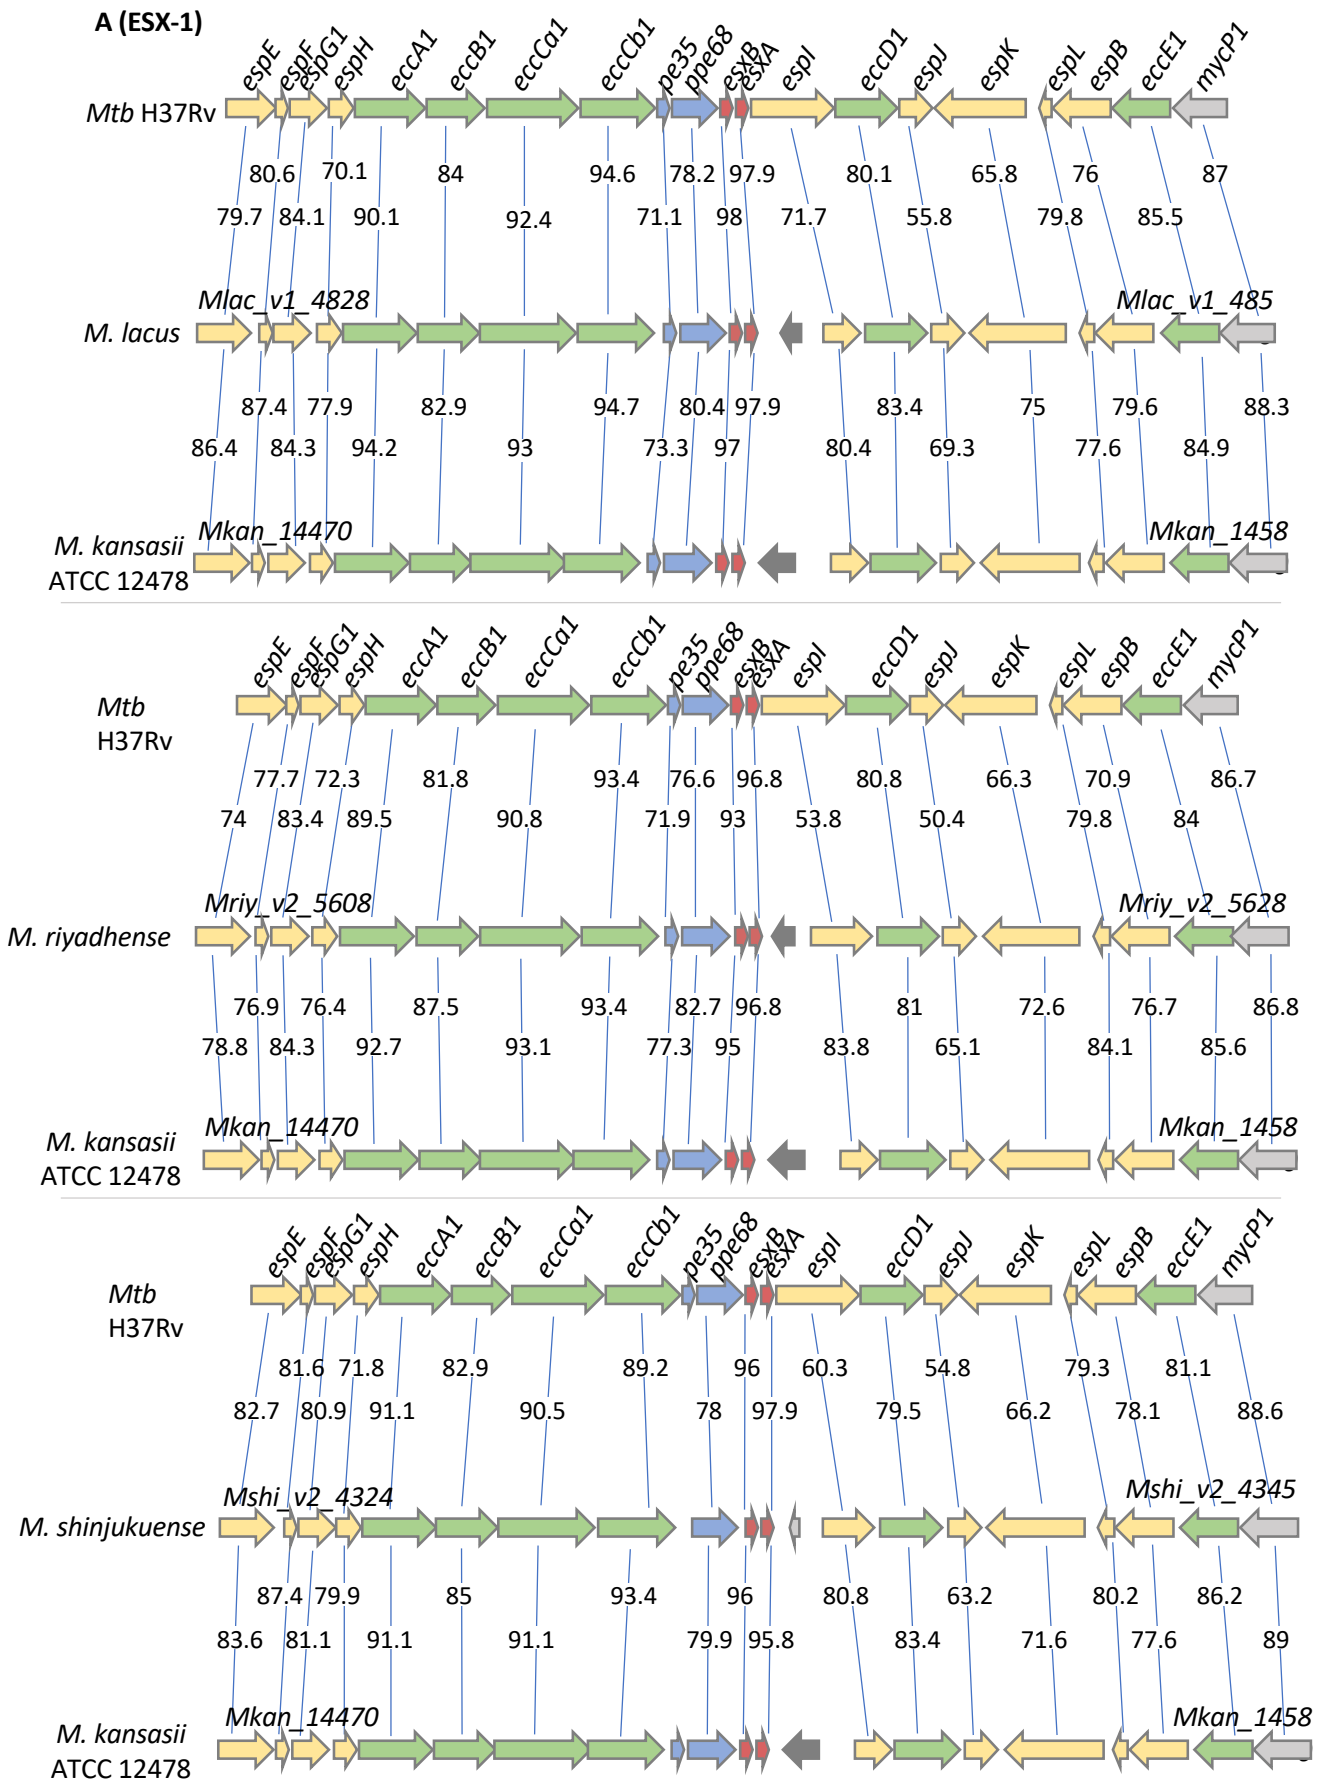

**B (ESX-2)**

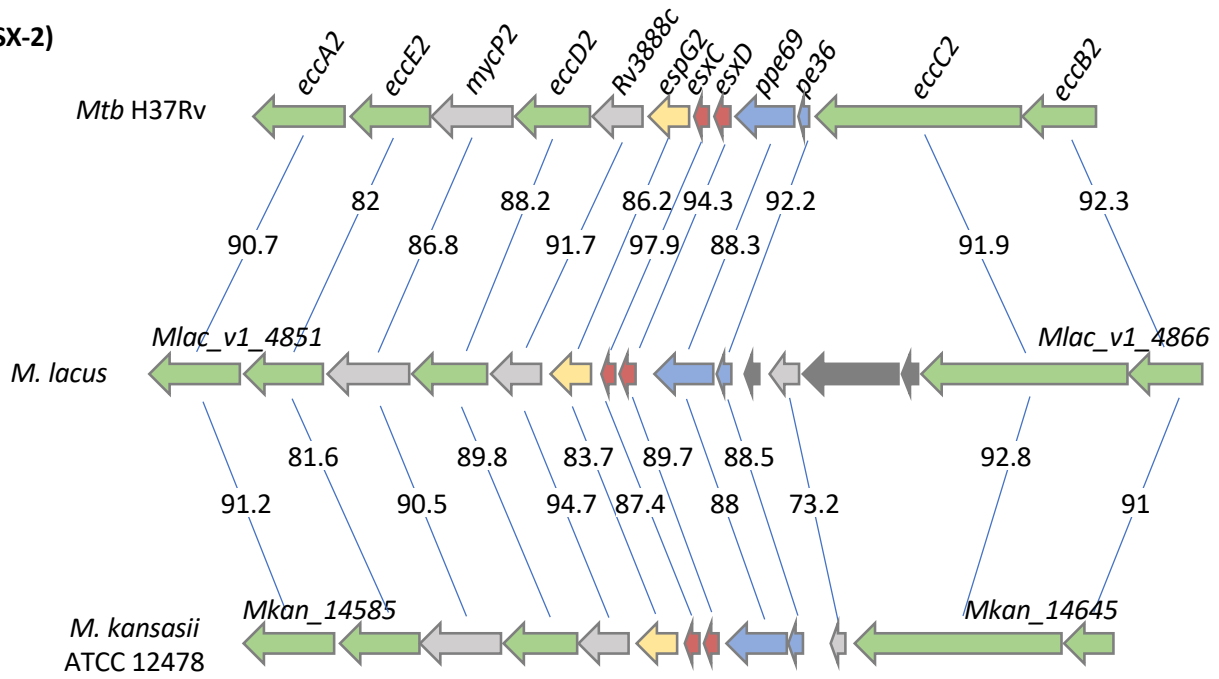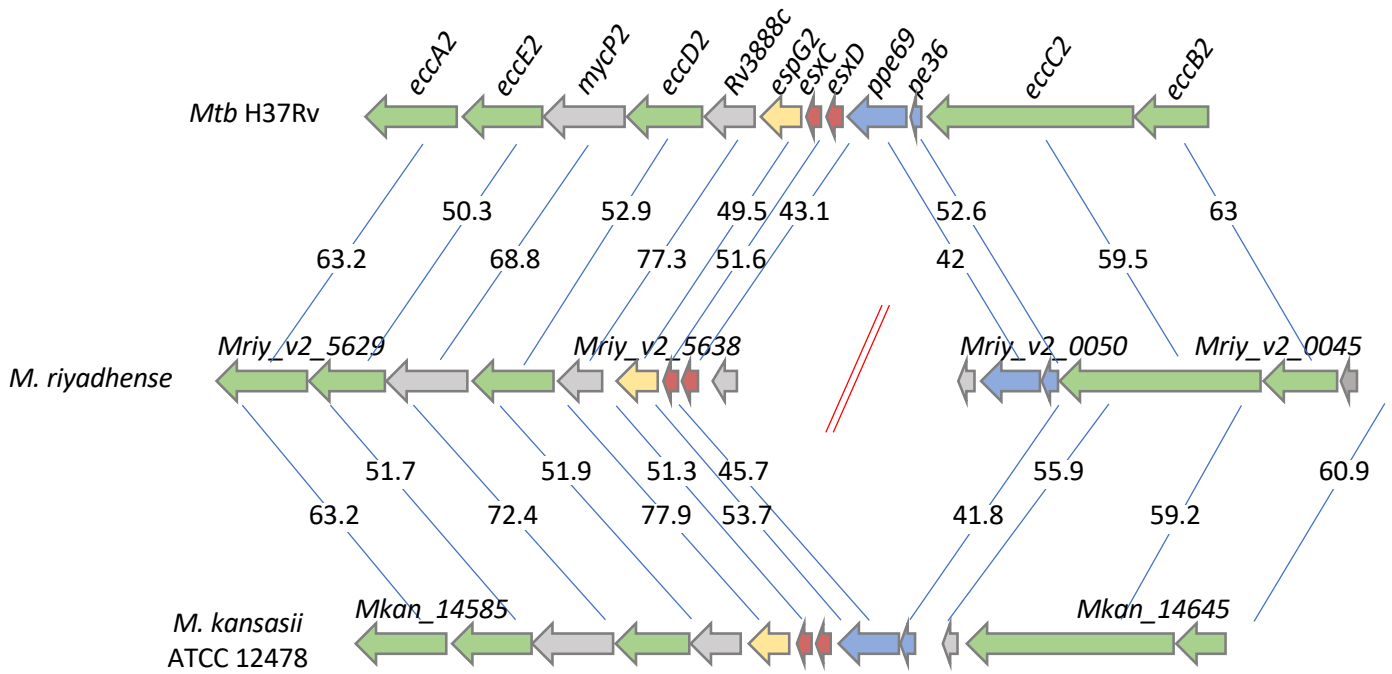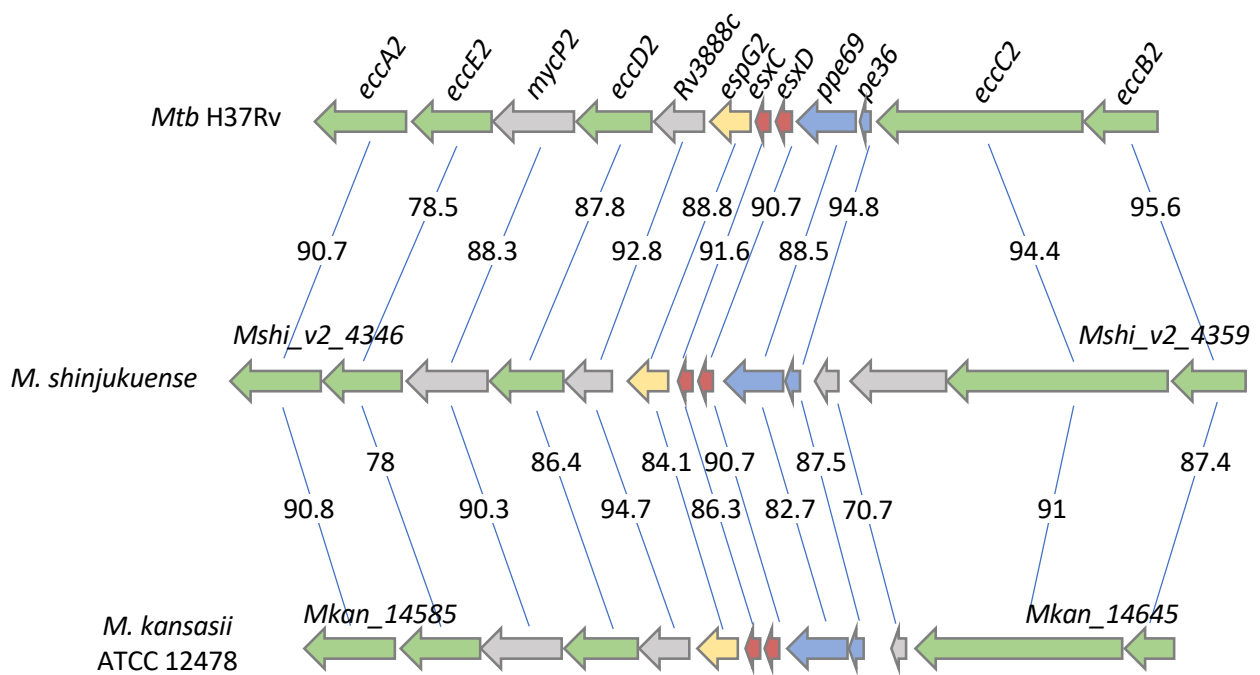

C (ESX-3)

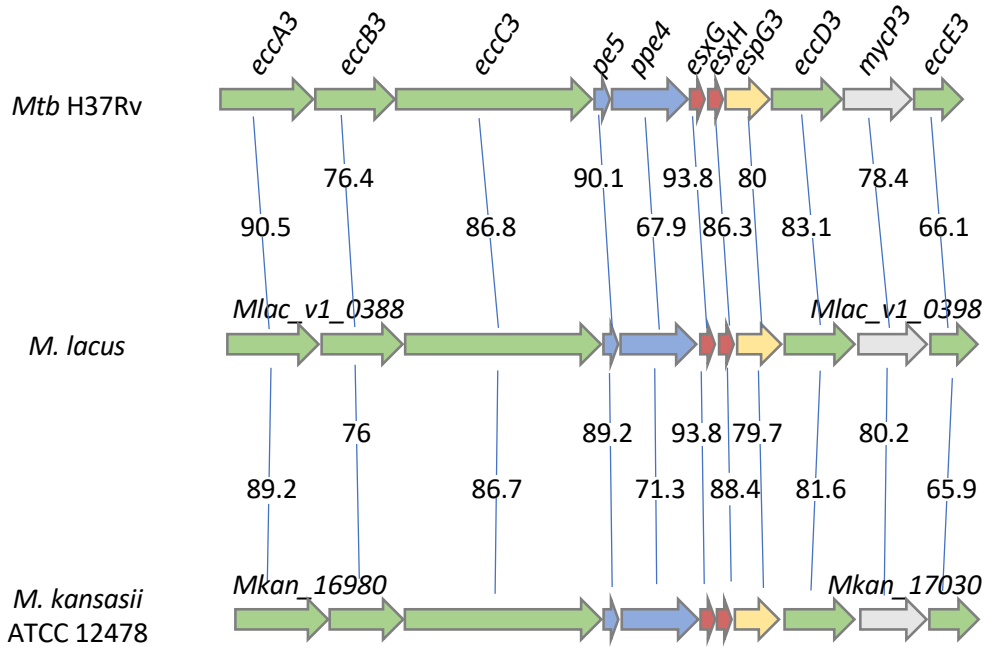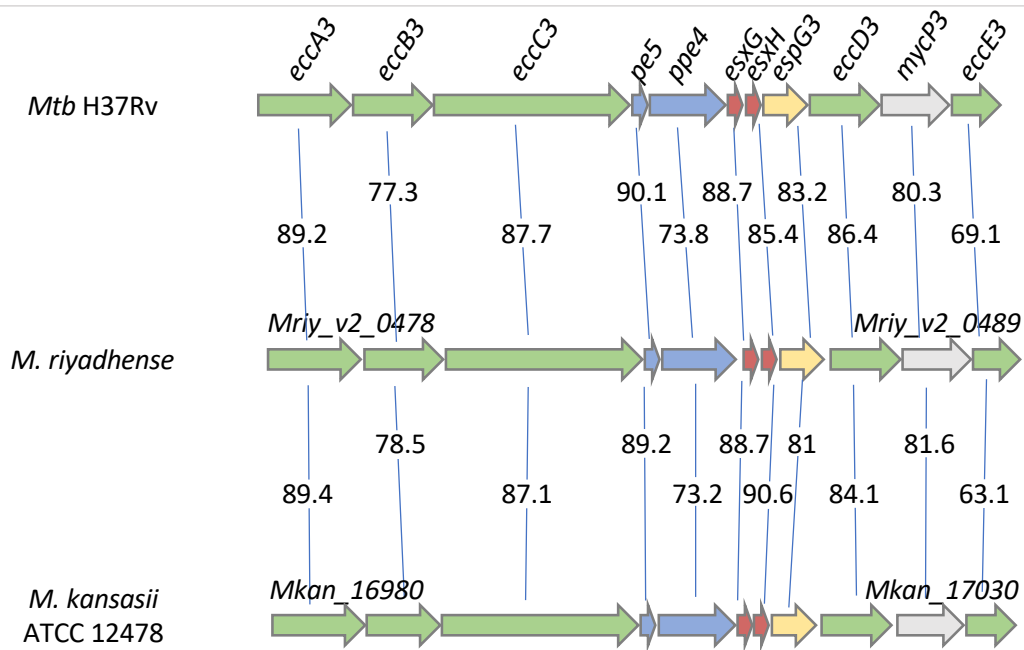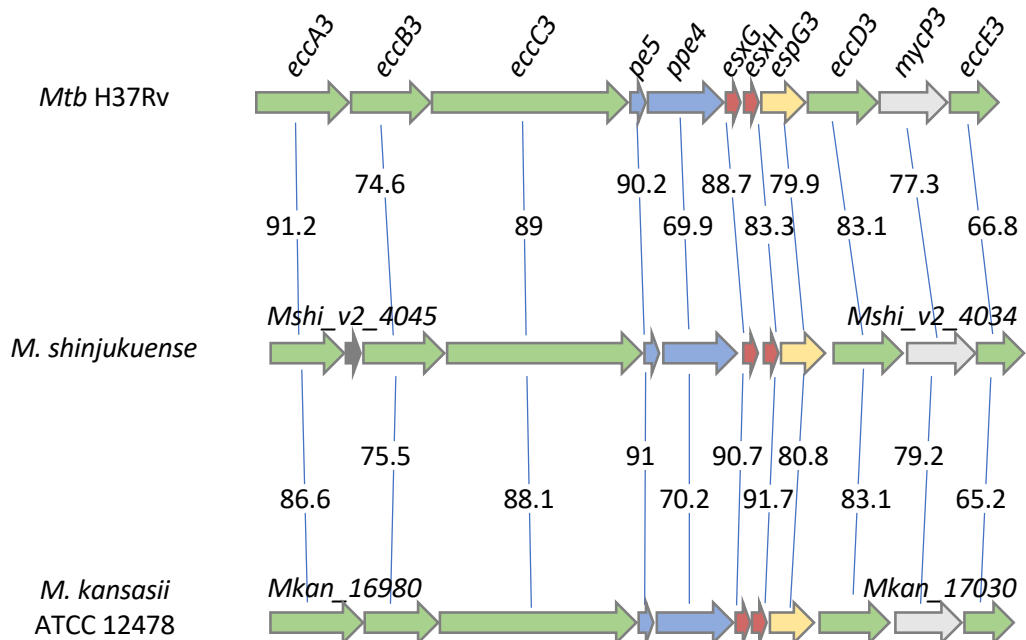

D (ESX-4)

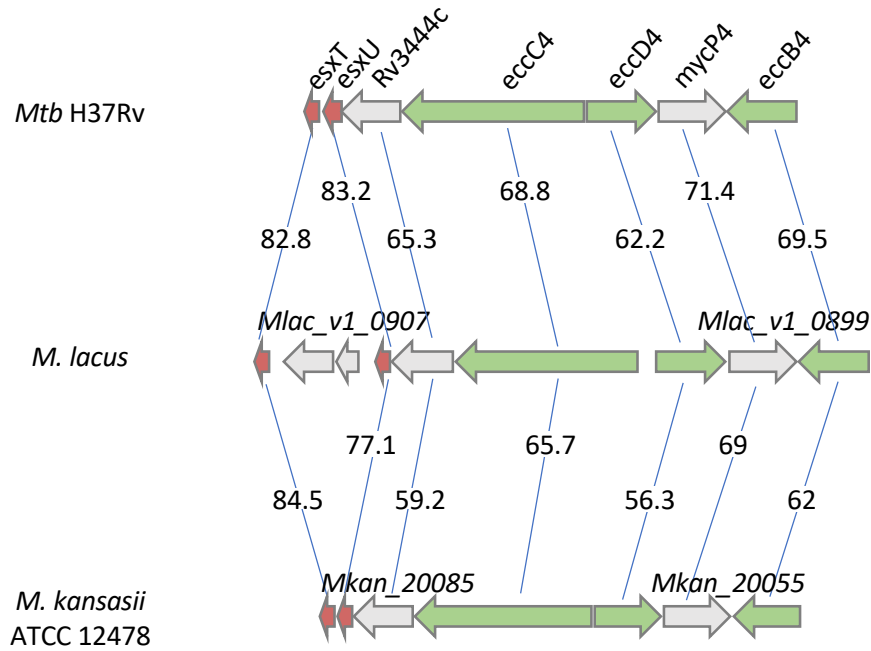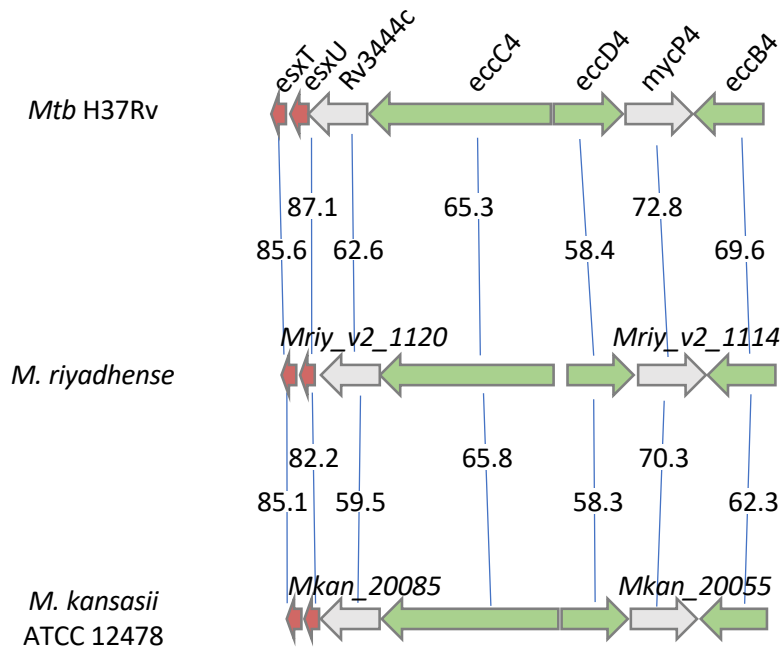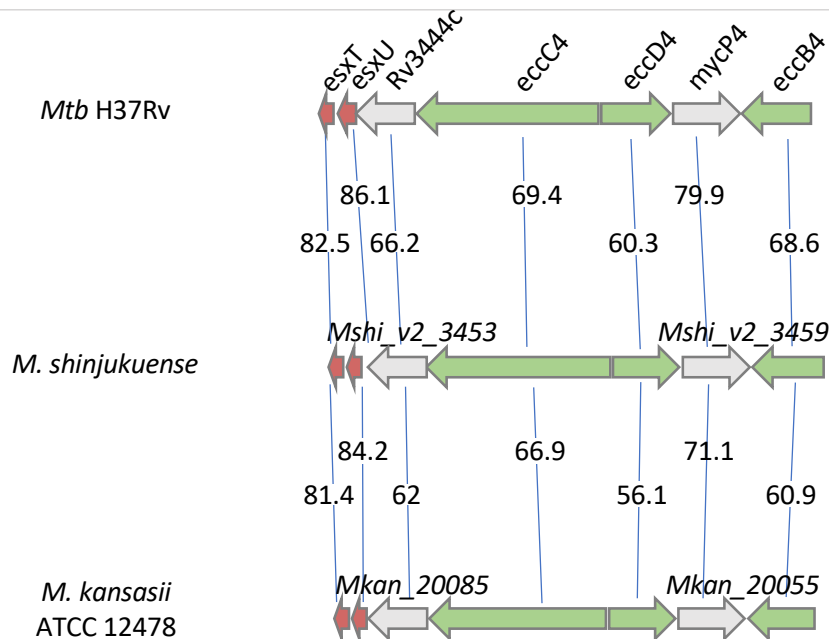

E (ESX-5)

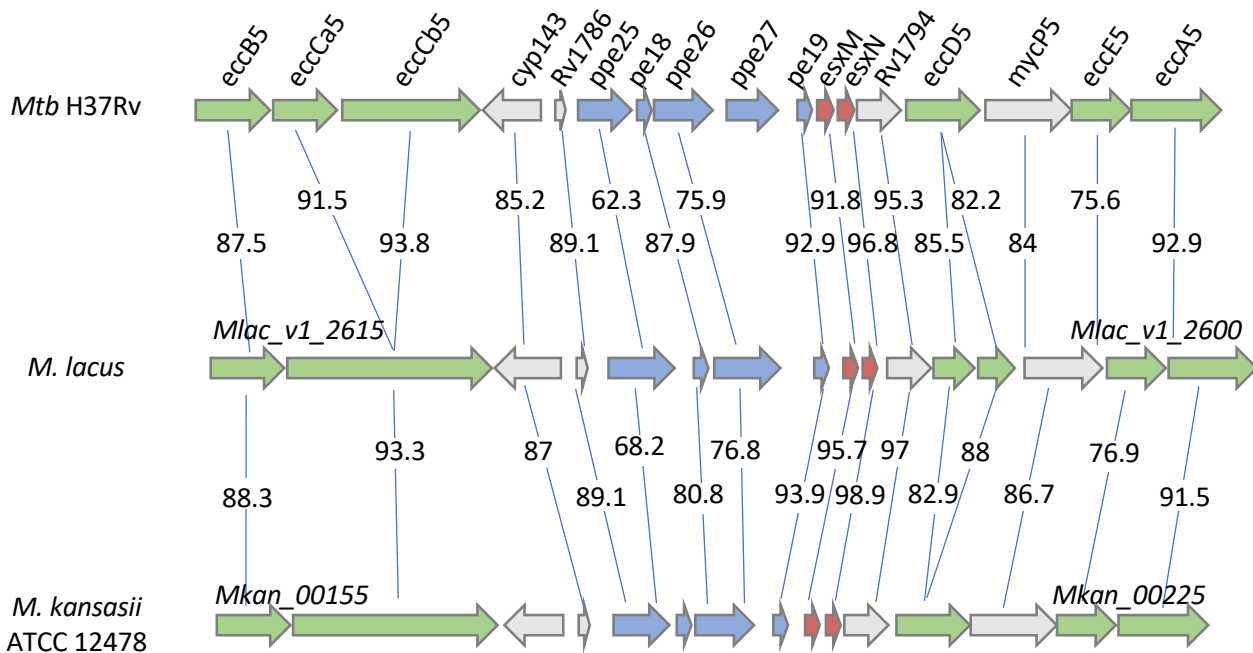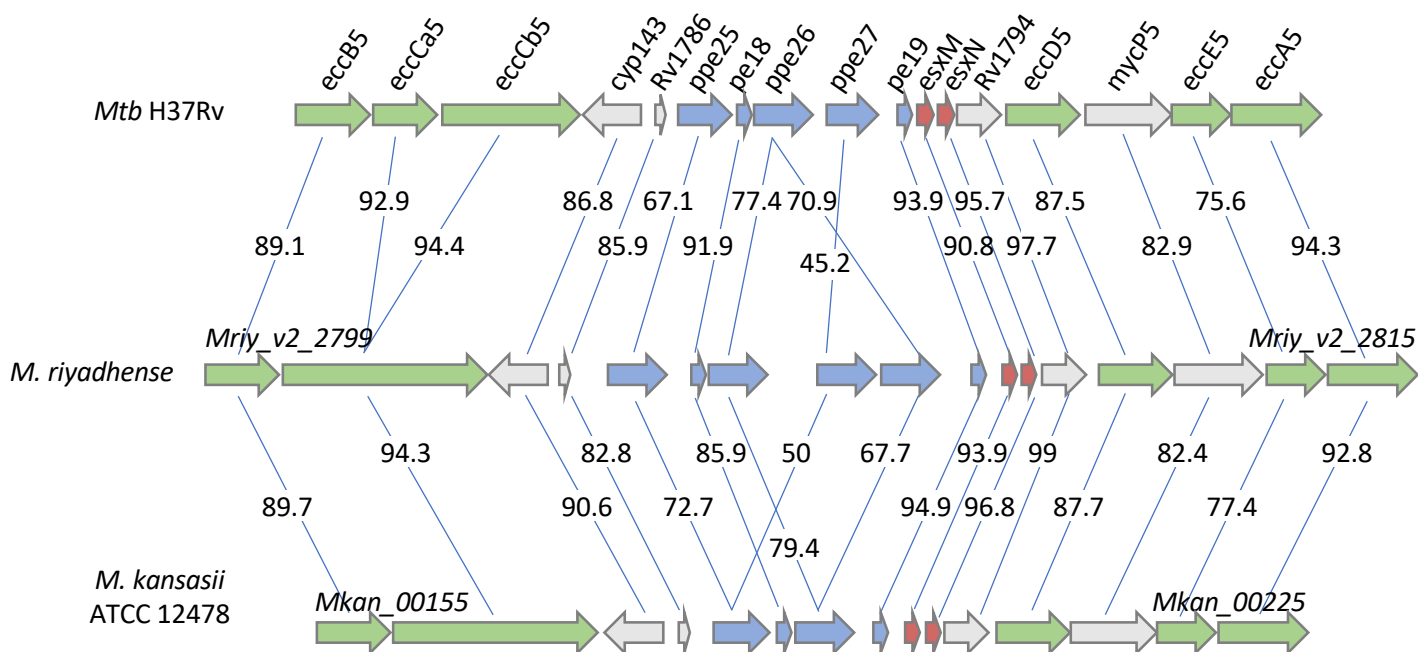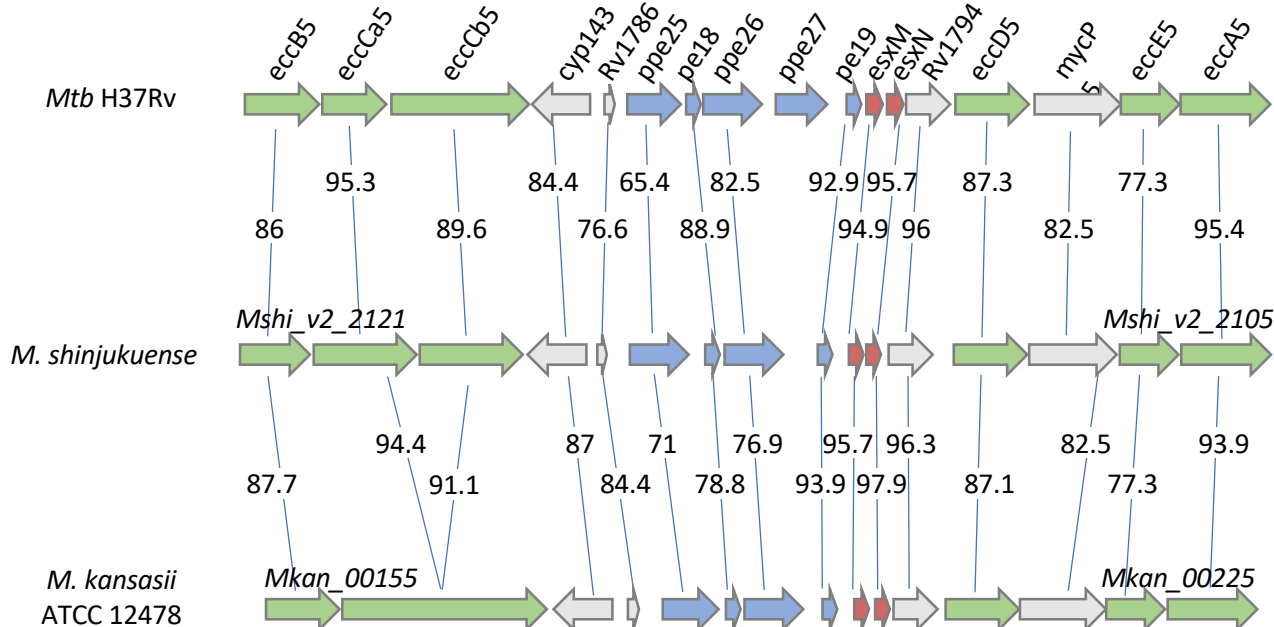

Supplement: spectrum.04126-23-s0001.pdf [file spectrum.04126-23-s0001.pdf]
