# Supplementary material for: Genomic and phenotypic characterization of Mycobacterium tuberculosis’ closest-related non-tuberculous mycobacteria
Source: PubMed Central journal article supplement (PMC11237670; doi:10.1128/spectrum.04126-23), 2024-05-03

**Supplemental Fig. S3:** Results of resazurin assays to determine the MIC and the resistance to anti-TB drugs of the four tested NTM species, and *M. kansasii* and *Mtb* H37Rv as controls.

Plate layout:

| µg/mL |     |     |      |       |        |         |         |         |         |         | Range (% OD) |     |
|-------|-----|-----|------|-------|--------|---------|---------|---------|---------|---------|--------------|-----|
| RIF   | 4   | 2   | 1    | 0.5   | 0.25   | 0.125   | 0.0625  | 0.0313  | 0.0156  | 0.0078  | 100          | 100 |
|       | 4   | 2   | 1    | 0.5   | 0.25   | 0.125   | 0.0625  | 0.0313  | 0.0156  | 0.0078  | 90           | 90  |
| INH   | 32  | 16  | 8    | 4     | 2      | 1       | 0.5     | 0.25    | 0.125   | 0.0625  | 75           | 75  |
|       | 32  | 16  | 8    | 4     | 2      | 1       | 0.5     | 0.25    | 0.125   | 0.0625  | 50           | 50  |
| ETH   | 60  | 30  | 15   | 7.5   | 3.75   | 1.875   | 0.9375  | 0.4688  | 0.2344  | 0.1172  | 10           | 10  |
|       | 60  | 30  | 15   | 7.5   | 3.75   | 1.875   | 0.9375  | 0.4688  | 0.2344  | 0.1172  | 5            | 5   |
| BDQ   | 0.2 | 0.1 | 0.05 | 0.025 | 0.0125 | 0.00625 | 0.00313 | 0.00156 | 0.00078 | 0.00039 | 2            | 2   |
|       | 0.2 | 0.1 | 0.05 | 0.025 | 0.0125 | 0.00625 | 0.00313 | 0.00156 | 0.00078 | 0.00039 | 0            | 0   |

*M. decipiens*

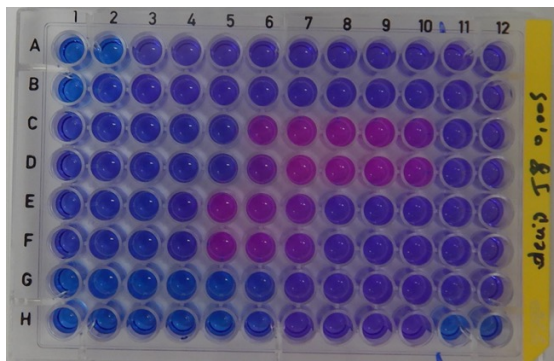

*M. lacus*

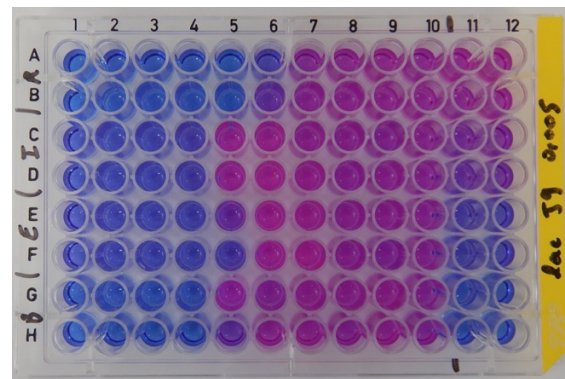

*M. riyadhense*

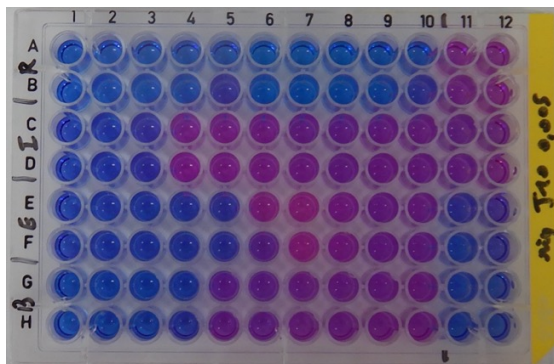

*M. shinjukuense*

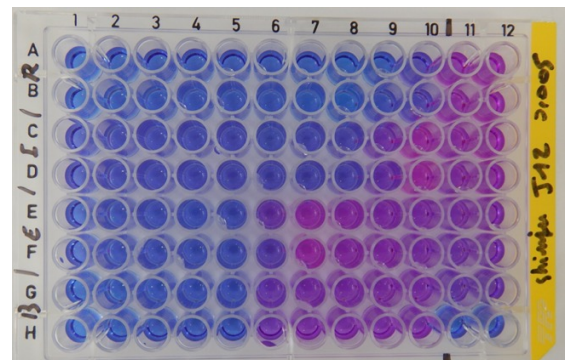

*M. kansasii*

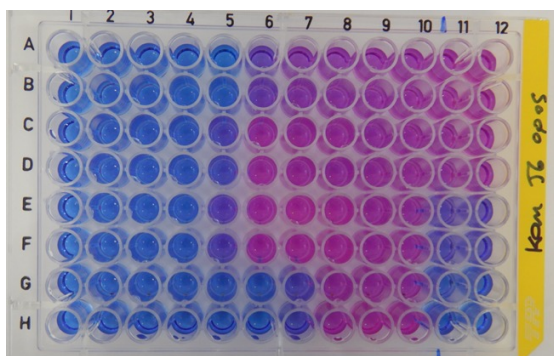

*Mtb* H37Rv

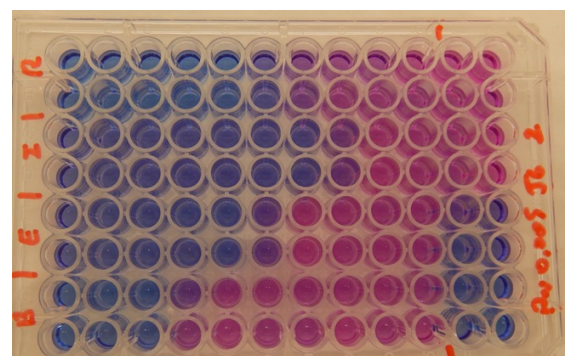

Supplement: spectrum.04126-23-s0003.pdf [file spectrum.04126-23-s0003.pdf]
